# Supplementary material for: Mercury behaviour in flue gas from sewage sludge incinerators and melting furnace
Source: Oxford University Press journal article supplement (doi:10.2166/wst.2018.268), 2018-06-01
Supplement: wst2018268supp.docx [file wst2018268supp.docx]

Supplementary Material

Table S-1. Mercury flows in SSI-A, SSI-B and MF-A samples

| SSI-A | Concentration | Unit | Volume | Unit | Flow (g/day) |
| --- | --- | --- | --- | --- | --- |
| Dewatered sludge | 0.12 | mg/kg | 166 | t/day | 19.9 |
| Flue gas before CT | 43 | μg/Nm3 | 17600 | Nm3/hr | 18.2 |
| Ash | 0.44 | mg/kg | 5.2 | t/day | 2.3 |
| Flue gas before WS | 41 | μg/Nm3 | 17800 | Nm3/hr | 17.5 |
| WS wastewater | 8.4 | μg/L | - | - | - |
| Flue gas at Stack | 6.7 | μg/Nm3 | 24600 | Nm3/hr | 4.0 |
| SSI-B | Concentration | Unit | Volume | Unit | Flow (g/day) |
| Dewatered sludge | 0.43 | mg/kg | 176 | t/day | 76.3 |
| Ash | 0.31 | mg/kg | 4.8 | t/day | 1.5 |
| Flue gas at stack | 5.4 | μg/Nm3 | 31400 | Nm3/hr | 4.0 |
| MF-A | Concentration | Unit | Volume | Unit | Flow (g/day) |
| Dried sludge | 0.48 | mg/kg | 37.5 | t/day | 18.0 |
| Slag | 0.021 | mg/kg | 6.1 | t/day | 0.13 |
| Flue gas before WS | 48 | μg/Nm3 | 13400 | Nm3/hr | 15.4 |
| Flue gas before wet EP | 11 | μg/Nm3 | 12700 | Nm3/hr | 3.4 |
| WS wastewater | 14.3 | μg/L | - | - | - |
| Flue gas at stack | 8.7 | μg/Nm3 | 8220 | Nm3/hr | 1.7 |
